# Supplementary material for: Molecular Codes in Biological and Chemical Reaction Networks
Source: PLOS journal article supplement (doi:10.1371/journal.pone.0054694), 2013-01-23
Supplement: S4 (10.1371/journal.pone.0054694.s004) [file journal.pone.0054694.s004]

# Reaction network formulation of a gene translation system with amino-acyl-tRNA-synthetases

| Eq. | Definition                                                                                                                                                                                                       | Description                                                                       |
|-----|------------------------------------------------------------------------------------------------------------------------------------------------------------------------------------------------------------------|-----------------------------------------------------------------------------------|
| 1   | $\mathcal{M}_{GC} = Codons \cup AA^{free} \cup AA^{prot} \cup aaRS \cup tRNA^{free} \cup tRNA^{loaded}$                                                                                                          | Definition of the molecular species in the network                                |
| 2   | $Codons = \{A,C,G,T\}^3 = \{AAA, AAC, \dots, TTT\}$                                                                                                                                                              | Set representing the 64 codons of the genetic code                                |
| 3   | $AA^{free} = \{Ala^{free}, Arg^{free}, Asp^{free}, \dots, Try^{free}\}$                                                                                                                                          | Amino acids that are not used in a protein                                        |
| 4   | $AA^{prot} = \{Ala^{prot}, Arg^{prot}, Asp^{prot}, \dots, Try^{prot}\}$                                                                                                                                          | Amino acids that have been used in a protein during gene translation              |
| 5   | $tRNA^{free} = \{tRNA_n   n \in Codons\}$                                                                                                                                                                        | Unloaded tRNAs specific for codon $n$                                             |
| 6   | $tRNA^{loaded} = \{tRNA_{n,a}   n \in Codons, a \in AA_{free}\}$                                                                                                                                                 | tRNAs specific for codon $n$ that have been loaded with amino acid $a$            |
| 7   | $aaRS = \{Syn_{n,a}   n \in Codons, a \in AA_{free}\}$                                                                                                                                                           | Amino-acyl-tRNA-synthetases that are specific for amino acid $a$ and codon $n$    |
| 8   | $\mathcal{R}_{GC} = \{tRNA_n + a + Syn_{n,a} \rightarrow tRNA_{a,n} + Syn_{n,a} \mid n \in Codons, a \in AA^{free}\} \cup$<br>$\{n + tRNA_{a,n} \rightarrow n + tRNA_n + a \mid n \in Codons, a \in AA^{prot}\}$ | Loading of the tRNA by suitable synthetasis                                       |
| 9   |                                                                                                                                                                                                                  | Translation step, i.e., the incorporation of an amino acid into a growing protein |
